# Supplementary material
Source: publisher figshare collection journal article supplement (https://karger.figshare.com/articles/dataset/_/5692957)
Supplement: Supplementary file 1 [file 1]

**Supplementary Material – Jonkman et al.**

***Predicting trajectories of functional decline in 60-70 year old people***

**Supplementary Table 1:** Baseline characteristics for InCHIANTI and LASA cohorts for young older males and females.

**Supplementary Table 2:** Overview of assessment of all variables in InCHIANTI and LASA cohorts and harmonization of variables.

**Supplementary Table 3:** Univariate odds ratios for distinct trajectories of functional decline in young older males and females.

**Supplementary Figure 1:** Individual trajectories on functional decline across nine years for young older males and females.

**Supplementary Figure 2:** Calibration plots of predicted probabilities for the three outcome categories no/little decline in young older males and females.

**References Supplementary Material**

**Supplementary Table 1:** Baseline characteristics for InCHIANTI and LASA cohorts for young older males and females.

| **Variable** | **__________MALES__________** | | | **__________FEMALES________** | | |
| --- | --- | --- | --- | --- | --- | --- |
|  | **InCHIANTI** | **LASA** | **p-valuea** | **InCHIANTI** | **LASA** | **p-valuea** |
|  | **n=183** | **n=186** |  | **n=220** | **n=209** |  |
| ***Socio-demographic variables*** | | | | | | |
| Age, yrs | 66.9±2.3 | 67.9±1.7 | <0.001 | 67.0±2.4 | 68.0±1.7 | <0.001 |
| Not married | 39 (21.3%) | 30 (16.1%) | 0.202 | 50 (22.7%) | 90 (43.1%) | <0.001 |
| Living alone | 22 (12.0%) | 21 (11.3%) | 0.827 | 23 (10.5%) | 82 (39.2%) | <0.001 |
| Retired | 168 (91.8%) | 156 (83.9%) | 0.020 | 205 (93.2%) | 197 (95.2%) | 0.382 |
| <8 years education | 135 (73.8%) | 46 (24.7%) | <0.001 | 172 (78.2%) | 105 (50.2%) | <0.001 |
| Economic satisfaction |  |  |  |  |  |  |
| Sufficient | 95 (52.8%) | 41 (22.3%) | <0.001 | 121 (56.3%) | 55 (26.6%) | <0.001 |
| Bad | 11 (6.1%) | 13 (7.1%) |  | 18 (8.4%) | 17 (8.2%) |  |
| ***Performance related variables*** | | | | | | |
| Unable to perform tandem stand for 10s | 7 (4.1%) | 27 (14.7%) | 0.001 | 23 (11.4%) | 52 (25.2%) | <0.001 |
| Chair stands, s | 9 (8-11) | 11 (10-13) | <0.001 | 10 (9-12) | 12 (10-13) | <0.001 |
| Gait speed, m/s | 1.57±0.26 | 0.96±0.26 | <0.001 | 1.27±0.25 | 0.88±0.24 | <0.001 |
| Handgrip strength, kg | 44.0±9.2 | 41.9±7.4 | 0.030 | 25.3±6.9 | 25.1±4.7 | 0.740 |
| ≥1 fall within last 12 months | 16 (8.7%) | 55 (29.6%) | 0.001 | 53 (24.1%) | 63 (30.1%) | 0.205 |
| Fear of falling | 33 (18.0%) | 16 (8.6%) | 0.008 | 44 (20.0%) | 53 (25.4%) | 0.185 |
| ***Lifestyle variables*** | | | | | | |
| Physical activity |  |  |  |  |  |  |
| Moderate level | 64 (35.2%) | 62 (33.7%) | <0.001 | 119 (54.1%) | 51 (24.6%) | <0.001 |
| Low level | 7 (3.8%) | 61 (33.2%) |  | 26 (11.8%) | 45 (21.7%) |  |
| Smoking behavior |  |  |  |  |  |  |
| Former smoker | 52 (28.4%) | 125(67.2%) | <0.001 | 58 (26.4%) | 67 (32.1%) | 0.414 |
| Current smoker | 31 (16.9%) | 41 (22.0%) |  | 41 (18.6%) | 38 (18.2%) |  |
| ≥1 glasses alcohol/ week | 136 (74.3%) | 166 (89.2%) | <0.001 | 172 (78.2%) | 162 (77.5%) | 0.014 |
| ***Clinical variables*** | | | | | | |
| BMI |  |  | <0.001 |  |  |  |
| 25-29.99 | 98 (55.4%) | 94 (50.5%) |  | 96 (46.8%) | 80 (38.6%) | 0.137 |
| ≥30 | 47 (26.6%) | 27 (14.5%) |  | 54 (26.3%) | 54 (26.1%) |  |
| Waist circumference  ≥102 cm in men/  ≥88 cm in women | 36 (20.7%) | 82 (44.6%) | <0.001 | 146 (73.0%) | 108 (54.5%) | <0.001 |
| Blood pressure, mmHG | 114.0±13.1 | 115.9±16.1 | 0.203 | 115.4±12.8 | 112.8±15.9 | 0.660 |
| Self-reported chronic diseases | | | | | | |
| Cardiovascular | 23 (12.6%) | 45 (24.2%) | 0.004 | 27 (12.3%) | 33 (15.8%) | 0.294 |
| Peripheral artery | 19 (10.4%) | 17 (9.1%) | 0.687 | 19 (8.6%) | 14 (6.7%) | 0.452 |
| Diabetes mellitus | 22 (12.0%) | 10 (5.4%) | 0.023 | 24 (10.9%) | 11 (5.3%) | 0.033 |
| Stroke | 8 (4.4%) | 7 (3.8%) | 0.767 | 9 (4.1%) | 4 (1.9%) | 0.189 |
| COPD | 21 (11.5%) | 23 (12.4%) | 0.792 | 17 (7.7%) | 19 (9.1%) | 0.611 |
| Arthritis | 21 (11.5%) | 54 (29.0%) | <0.001 | 30 (13.6%) | 111 (53.1%) | <0.001 |
| Cancer | 8 (4.4%) | 13 (7.0%) | 0.278 | 16 (7.3%) | 35 (16.7%) | 0.002 |
| ≥3 medications | 47 (25.7%) | 46 (24.7%) | 0.833 | 50 (22.7%) | 52 (24.9%) | 0.601 |
| Cognitive functioning, MMSE score | 27 (25-28) | 28 (27-29) | <0.001 | 27 (25-28) | 28 (27-29) | <0.001 |
| Depressive symptoms present (>16 CES-D) | 34 (18.6%) | 9 (4.9%) | <0.001 | 40 (18.2%) | 32 (15.5%) | 0.453 |

*Notes:* Data are presented as mean ± SD, n (%), or median (IQR).

a Tested with independent samples t-test for continuous data and Chi-square test for categorical data.

**Supplementary Table 2:** Overview of assessment of all variables in InCHIANTI and LASA cohorts and harmonization of variables.

| **Variable** | **InCHIANTI** | **LASA** | **Harmonized variable** |
| --- | --- | --- | --- |
| ***Outcome*** | | | |
| *Functional decline* | 14 self-reported items on the difficulty with ADL or iADL activities, scored  0 - no difficulty  1 - with difficulty, but without help  2 - only with help  3 - unable to do  Selection of 6 overlapping items:   - dressing and undressing - sitting down, standing up in bed - using own or public transportation - walking up and down a staircase of 10 steps without resting - walking outside for 400 meters - cutting own toenails | 6 self-reported items on the difficulty with ADL or iADL activities, scored:  0 - no difficulty  1 - with some difficulty  2 - with much difficulty, but without help  3 - only with help  4 - unable to do  Selection of 6 overlapping items:   - dressing and undressing - sitting down, standing up a chair - using own or public transportation - walking up and down a staircase of 15 steps without resting - walking outside during 5 minutes without stopping - cutting own toenails | 6 overlapping items scored:  0 - no difficulty  1 - with difficulty, but without help  2 - only with help  3 - unable to do  Total score = sum score of 6 items (0-18) |
| ***Socio-demographic variables*** | | | |
| *Sex* | Derived from population registry | Derived from population registry | Binary variable:   - male - female |
| *Age* | Derived from population registry | Derived from population registry | Years of age |
| *Marital status* | Categorized:   - married - divorced - widowed - not married | Categorized:   - married - divorced - widowed - never married | Categorized:   - married - not married/ divorced/ widowed |
| *Living status* | Categorized:   - not living alone - living alone | Number of people living in household | Categorized:   - not living alone - living alone |
| *Occupational status* | Categorized:   - currently employed - retired/not working | Categorized:   - paid job at present - retired - disability pension - unemployed | Categorized:   - currently employed - retired/not working |
| *Level of education* | Number of years of education completed | Categorized, categories converted to number of years of education completed:   - elementary education not completed (5 yrs) - elementary education (6 yrs) - lower vocational education (9 yrs) - general intermediate education (10 yrs) - intermediate vocational education (11 yrs) - general secondary education (12 yrs) - high vocational education (15 yrs) - college education (16 yrs) - university (18 yrs) | Categorized:   - ≥8 years education - <8 years education |
| *Economic satisfaction* | Categorized:   - good - sufficient - bad - don’t know | Categorized:   - satisfied - a little satisfied - not satisfied/dissatisfied - a little dissatisfied - dissatisfied | Categorized:   - good - sufficient - bad |
| ***Physical performance variables*** | | | |
| *Balance* | Time able to perform a tandem stand, in s (max. 10 s) | Time able to perform a tandem stand, in s (max. 10 s) | Categorized:   - able to perform 10 s - not able to perform 10 s |
| *Chair stands* | Time to perform 5 repeated chair stands as quickly as possible, in s | Time to perform 5 repeated chair stands as quickly as possible, in s | Time in s |
| *Gait speed* | Gait speed for walking 7 m as quickly as possible, in m/s | Gait speed for walking 3+3 m as quickly as possible, in m/s | Z-score of gait speed in m/s by subtracting mean, then dividing by SD |
| *Handgrip strength* | 2 measurements of both hands, in kg, using a dynamometer (Takei TKK 5001, Takei Scientific Instruments Co. Ltd., Tokyo, Japan) | 2 measurements of both hands, in kg, using a dynamometer (Takei TKK 5001, Takei Scientific Instruments Co. Ltd., Tokyo, Japan) | Maximum score of 1 of both hands, in kg |
| *Fall history* | Self-reported falls in the last 12 months | Self-reported falls in the last 12 months | Number of falls in last year, categorized:   - no falls - ≥1 falls |
| *Fear of falling* | SAFE scale containing 11 self-reported items, scored:  0 – no fear  1 – does not do the activity due to fear of falling  Selection of 5 overlapping items:   - preparation of simple meals - taking a bath - do some shopping - a small walk in the neighborhood - picking something from a deep or low cupboard   Total score = sum score of 5 items (0-5) | FES scale containing 10 self-reported items, scored:  0 – not concerned  1 – a little concerned  2 – fairly concerned  3 – very concerned  0 – does not/cannot do  Selection of 5 overlapping items:   - preparation of simple meals - taking a bath - do some shopping - a small walk in the neighborhood - picking something from a deep or low cupboard   Total score = sum score of 5 items (0-15) | Categorized:   - no fear of falling (score = 0) - some fear of falling (score ≥ 1) |
| ***Lifestyle variables*** | | | |
| *Physical activity* | Weekly intensity categorized:   - Hardly any physical activity (low) - Mostly sitting/some walking (low) - Light exercise 2-4 hrs/week (moderate) - Moderate 1-2 hrs or light >4 hrs/wk (moderate) - Moderate exercise >3 hrs/wk - Intense exercise many times/wk | LAPAQ questionnaire for measuring time spent last two weeks on bicycling, walking outdoors, and doing sports. | InCHIANTI participants were categorized in three levels:   - high level (intense/moderate exercise>3hrs/wk) - moderate level (light/moderate exercise 1-2 hrs/wk) - low level (hardly any activity/some walking)   LASA participants were categorized based on sex-specific tertiles:   - high level (highest tertile) - moderate level (medium tertile) - low level (lowest tertile) |
| *Smoking behaviour* | Categorized:   - never smoker - former smoker - current smoker | Categorized:   - never smoker - former smoker - current smoker | Categorized:   - never smoker - former smoker - current smoker |
| *Alcohol intake* | Number of alcoholic units per week, specified by type of drink (i.e., wine, beer, spirits) | Number of alcoholic drinks per week | Number of alcoholic glasses per week, categorized:   - none - ≥1 glasses |
| ***Clinical variables*** | | | |
| *BMI* | Measured weight (in kg) divided by measured length (in squared m) | Measured weight (in kg) divided by measured length (in squared m) | kg/m2, categorized:   - normal (<25) - overweight (25-29.99) - obese (≥30) |
| *Waist circumference* | Measured in cm | Mean of 2 measurements, in cm | cm, categorized:   - no increased risk(<94 cm in men, <80 cm in women) - increased risk (94-101 cm in men, 80-88 cm in women) - substantially increased risk (102 cm or higher in men, 88 cm or higher in women) |
| *Blood pressure* | Diastolic and systolic blood pressure, measured at the arm during a sitting position, in mmHG | Mean diastolic and mean systolic blood pressure of 2 measurements, measured at the arm during a sitting position, in mmHG | Mean of diastolic and systolic blood pressure, in mmHg |
| *Self-reported chronic diseases* | Self-reported chronic diseases, no pre-specified categories. | Self-reported chronic diseases in categories:   - cardiovascular disease - peripheral artery disease - diabetes mellitus - chronic non-specific lung disease - stroke - rheumatoid arthritis - osteoarthritis - malignant neoplasms | Chronic diseases, categorized:   - cardiovascular disease - peripheral artery disease - diabetes mellitus - chronic non-specific lung disease - stroke - rheumatoid/osteoarthritis - cancer |
| *Medication use* | Self-reported number of medications | Self-reported number of medications | Number of medications, categorized:   - <3 medications - ≥3 medications |
| *Cognitive functioning* | MMSE scale | MMSE scale | MMSE score (1-30) |
| *Depressive symptoms* | CES-D scale | CES-D scale | CES-D score (0-60), categorized:   - no depressive symptoms - depressive symptoms (>16) |

*Notes:* ADL=activities of daily living; CES-D=Center for Epidemiologic Studies-Depression(1); FES= Falls Efficacy Scale(2); iADL=instrumental activities of daily living; LAPAQ=LASA Physical Activity Questionnaire(3, 4); MMSE=Mini-Mental State Examination(5); SAFE=Survey of Activities and Fear of falling in the Elderly(6); SD=standard deviation.

**Supplementary Table 3:** Univariate odds ratios for distinct trajectories of functional decline in young older males and females.

| **Variable** | **MALES** | | **FEMALES** | |
| --- | --- | --- | --- | --- |
|  | **____Univariate OR (95% CI)____** | | **____Univariate OR (95% CI)____** | |
|  | **Intermediate vs. no/little decline** | **Severe vs.no/little decline** | **Intermediate vs. no/little decline** | **Severe vs.no/little decline** |
| ***Socio-demographic variables*** | | | | |
| Age, yrs | **1.15 (1.01-1.30)** | **1.06 (0.88-1.28)** | **1.21 (1.09-1.34)** | **1.50 (1.18-1.90)** |
| Not married | 0.97 (0.53-1.80) | 1.86 (0.82-4.20) | **1.48 (0.94-2.32)a** | **0.77 (0.33-1.80)a** |
| Living alone | 1.07 (0.52-2.23) | 1.66 (0.62-4.43) | **1.77 (1.05-2.97)** | **0.74 (0.29-1.87)** |
| Retired | 1.16 (0.58-2.31) | 2.95 (0.66-13.11) | 1.03 (0.42-2.52) | 0.44 (0.12-1.67) |
| <8 years education | **2.06 (1.17-3.62)** | **2.68 (1.15-6.23)** | 0.89 (0.56-1.40) | 1.80 (0.77-4.21) |
| Economic satisfaction |  |  |  |  |
| Good | 1.0 | 1.0 | 1.0 | 1.0 |
| Sufficient | **1.68 (0.98-2.87)** | **2.85 (1.28-6.36)** | **0.90 (0.56-1.44)** | **0.60 (0.24-1.52)** |
| Bad | **0.80 (0.29-2.19)** | **1.06 (0.22-5.16)** | **1.08 (0.62-1.87)** | **0.78 (0.27-2.23)** |
| ***Physical performance-related variables*** | | | | |
| Unable to perform tandem stand for 10s | **1.78 (0.79-4.00)** | **3.48 (1.24-9.78)** | **2.20 (1.24-3.89)** | **6.13 (2.52-14.88)** |
| Chair stands, s | **1.15 (1.05-1.26)a** | **1.26 (1.12-1.42)a** | **1.24 (1.14-1.36)a** | **1.47 (1.30-1.66)a** |
| Gait speed, Z-scoreb | **0.72 (0.56-0.93)** | **0.35 (0.23-0.54)** | **0.49 (0.38-0.63)** | **0.19 (0.11-0.33)** |
| Handgrip strength, kg | **0.99 (0.96-1.02)** | **0.92 (0.88-0.96)** | **0.97 (0.93-1.00)** | **0.88 (0.81-0.95)** |
| ≥1 fall within last 12 months | 2.78 (1.59-4.88) | 1.87 (0.78-4.50) | 0.74 (0.46-1.17) | 1.44 (0.65-3.19) |
| Fear of falling | **1.32 (0.63-2.76)** | **5.27 (2.24-12.42)** | **1.61 (0.97-2.66)** | **4.39 (1.99-9.71)** |
| ***Lifestyle variables*** | | | | |
| Physical activity |  |  |  |  |
| High level | 1.0 | 1.0 | 1.0 | 1.0 |
| Moderate level | **0.96 (0.56-1.64)** | **3.39 (1.32-8.69)** | **1.06 (0.67-1.68)** | **3.42 (1.33-8.83)** |
| Low level | **1.65 (0.84-3.24)** | **6.38 (2.10-19.41)** | **2.35 (1.04-5.29)** | **9.44 (2.76-32.24)** |
| Smoking behavior |  |  |  |  |
| Never smoker | 1.0 | 1.0 | 1.0 | 1.0 |
| Former smoker | 0.93 (0.50-1.72) | 0.61 (0.24-1.52) | **1.81 (1.09-3.01)** | **2.70 (0.69-10.56)** |
| Current smoker | 0.97 (0.48-1.95) | 0.44 (0.14-1.43) | **2.41 (1.34-4.31)** | **12.59 (3.50-45.24)** |
| ≥1 glasses alcohol/ week | **1.40 (0.72-2.74)** | **0.50 (0.22-1.16)** | **1.37 (0.82-2.28)** | **0.60 (0.26-1.36)** |
| ***Clinical variables*** | | | | |
| BMI |  |  |  |  |
| <25 | 1.0 | 1.0 | 1.0 | 1.0 |
| 25-29.99 | 1.12 (0.65-1.94) | 1.85 (0.69-5.00) | **1.08 (0.51-2.27)** | **0.27 (0.02-3.09)** |
| ≥30 | 1.09 (0.53-2.21) | 3.41 (1.13-10.31) | **1.36 (0.70-2.65)** | **3.76 (0.84-16.82)** |
| Waist circumference  ≥102 cm in men/  ≥88 cm in women | 1.17 (0.71-1.94) | 1.42 (0.66-3.07) | **1.21 (0.76-1.91)*** | **6.81 (1.97-23.52)*** |
| Blood pressure, mmHG | 1.00 (0.98-1.02) | 1.00 (0.98-1.03) | 1.01 (0.99-1.02) | 1.02 (0.99-1.04) |
| Self-reported chronic diseases | |  |  |  |
| Cardiovascular | **1.86 (1.03-3.37)** | **2.58 (1.13-5.86)** | **1.29 (0.70-2.38)** | **3.66 (1.55-8.65)** |
| Peripheral artery | 1.42 (0.66-3.05) | 1.37 (0.43-4.34) | **3.16 (1.36-7.33)** | **6.74 (2.18-20.80)** |
| Diabetes mellitus | 1.58 (0.70-3.60) | 1.81 (0.56-5.84) | **0.76 (0.34-1.69)** | **3.91 (1.36-11.24)** |
| Stroke | 1.27 (0.40-4.08) | 1.62 (0.33-8.06) | **3.13 (0.78-12.49)** | **10.61 (1.97-57.26)** |
| COPD | 1.49 (0.75-2.96) | 1.06 (0.34-3.30) | 1.32 (0.62-2.81) | 2.57 (0.87-7.60) |
| Arthritis | **1.51 (0.85-2.69)** | **2.32 (1.04-5.19)** | **2.06 (1.24-3.43)** | **2.22 (0.96-5.18)** |
| Cancer | 0.95 (0.33-2.69) | 2.17 (0.64-7.32) | 1.56 (0.81-2.98) | 1.87 (0.69-5.08) |
| ≥3 medications | **1.05 (0.61-1.80)** | **2.40 (1.15-5.03)** | **1.81 (1.10-2.96)** | **6.09 (2.74-13.55)** |
| Cognitive functioning, MMSE score | 0.99 (0.88-1.10) | 0.91 (0.78-1.06) | **0.96 (0.88-1.05)** | **0.85 (0.72-0.99)** |
| Depressive symptoms present (>16 CES-D) | **0.92 (0.40-2.11)** | **3.81 (1.50-9.67)** | **1.64 (0.96-2.80)** | **1.03 (0.34-3.16)** |

*Notes:* CES-D=Center for Epidemiologic Studies-Depression; CI=confidence interval; COPD=chronic obstructive pulmonary disease; MMSE=Mini-Mental State Examination; OR=odds ratio. Bold variables had a *p* value likelihood ratio test <0.20 and were included in the multivariable model.

a Variable not included in multivariable model due to multicollinearity.

b Odds ratios for gait speed refer to standardized Z-scores since different tests were applied in the two cohorts to assess gait speed. Z-scores were calculated per cohort:

Zmales InCHIANTI = (m/s – 1.570)/0.256

Zmales LASA = (m/s – 0.959)/0.257

Zfemales InCHIANTI = (m/s –1.271)/0.249

Zfemales LASA = (m/s – 0.876)/0.242

**
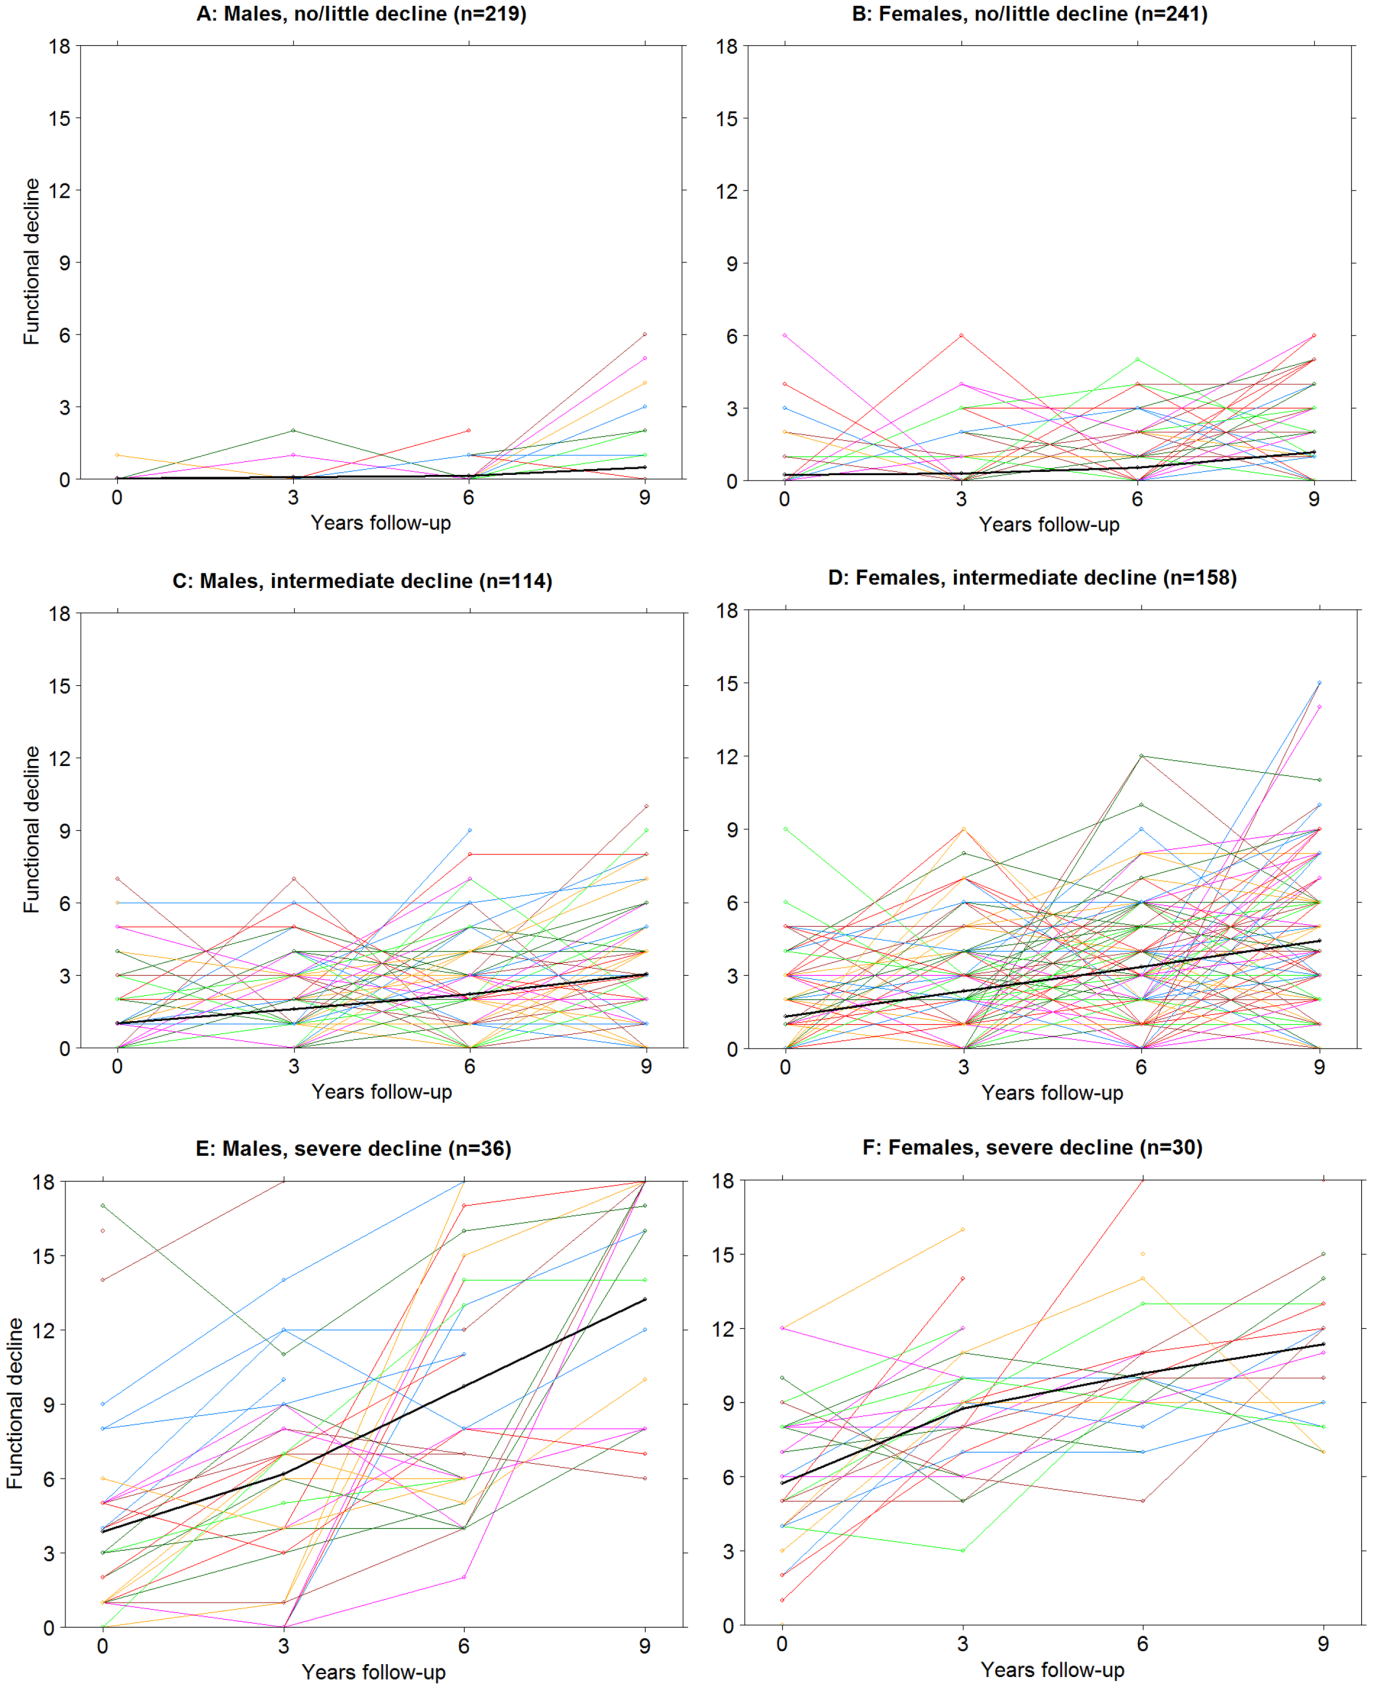
**

**Supplementary Figure 1:** Individual trajectories on functional decline across nine years for (A) no/little decline in males, (B) no/little decline in females, (C) intermediate decline in males, (D) intermediate decline in females, (E) severe decline in males, and (F) severe decline in females.

**
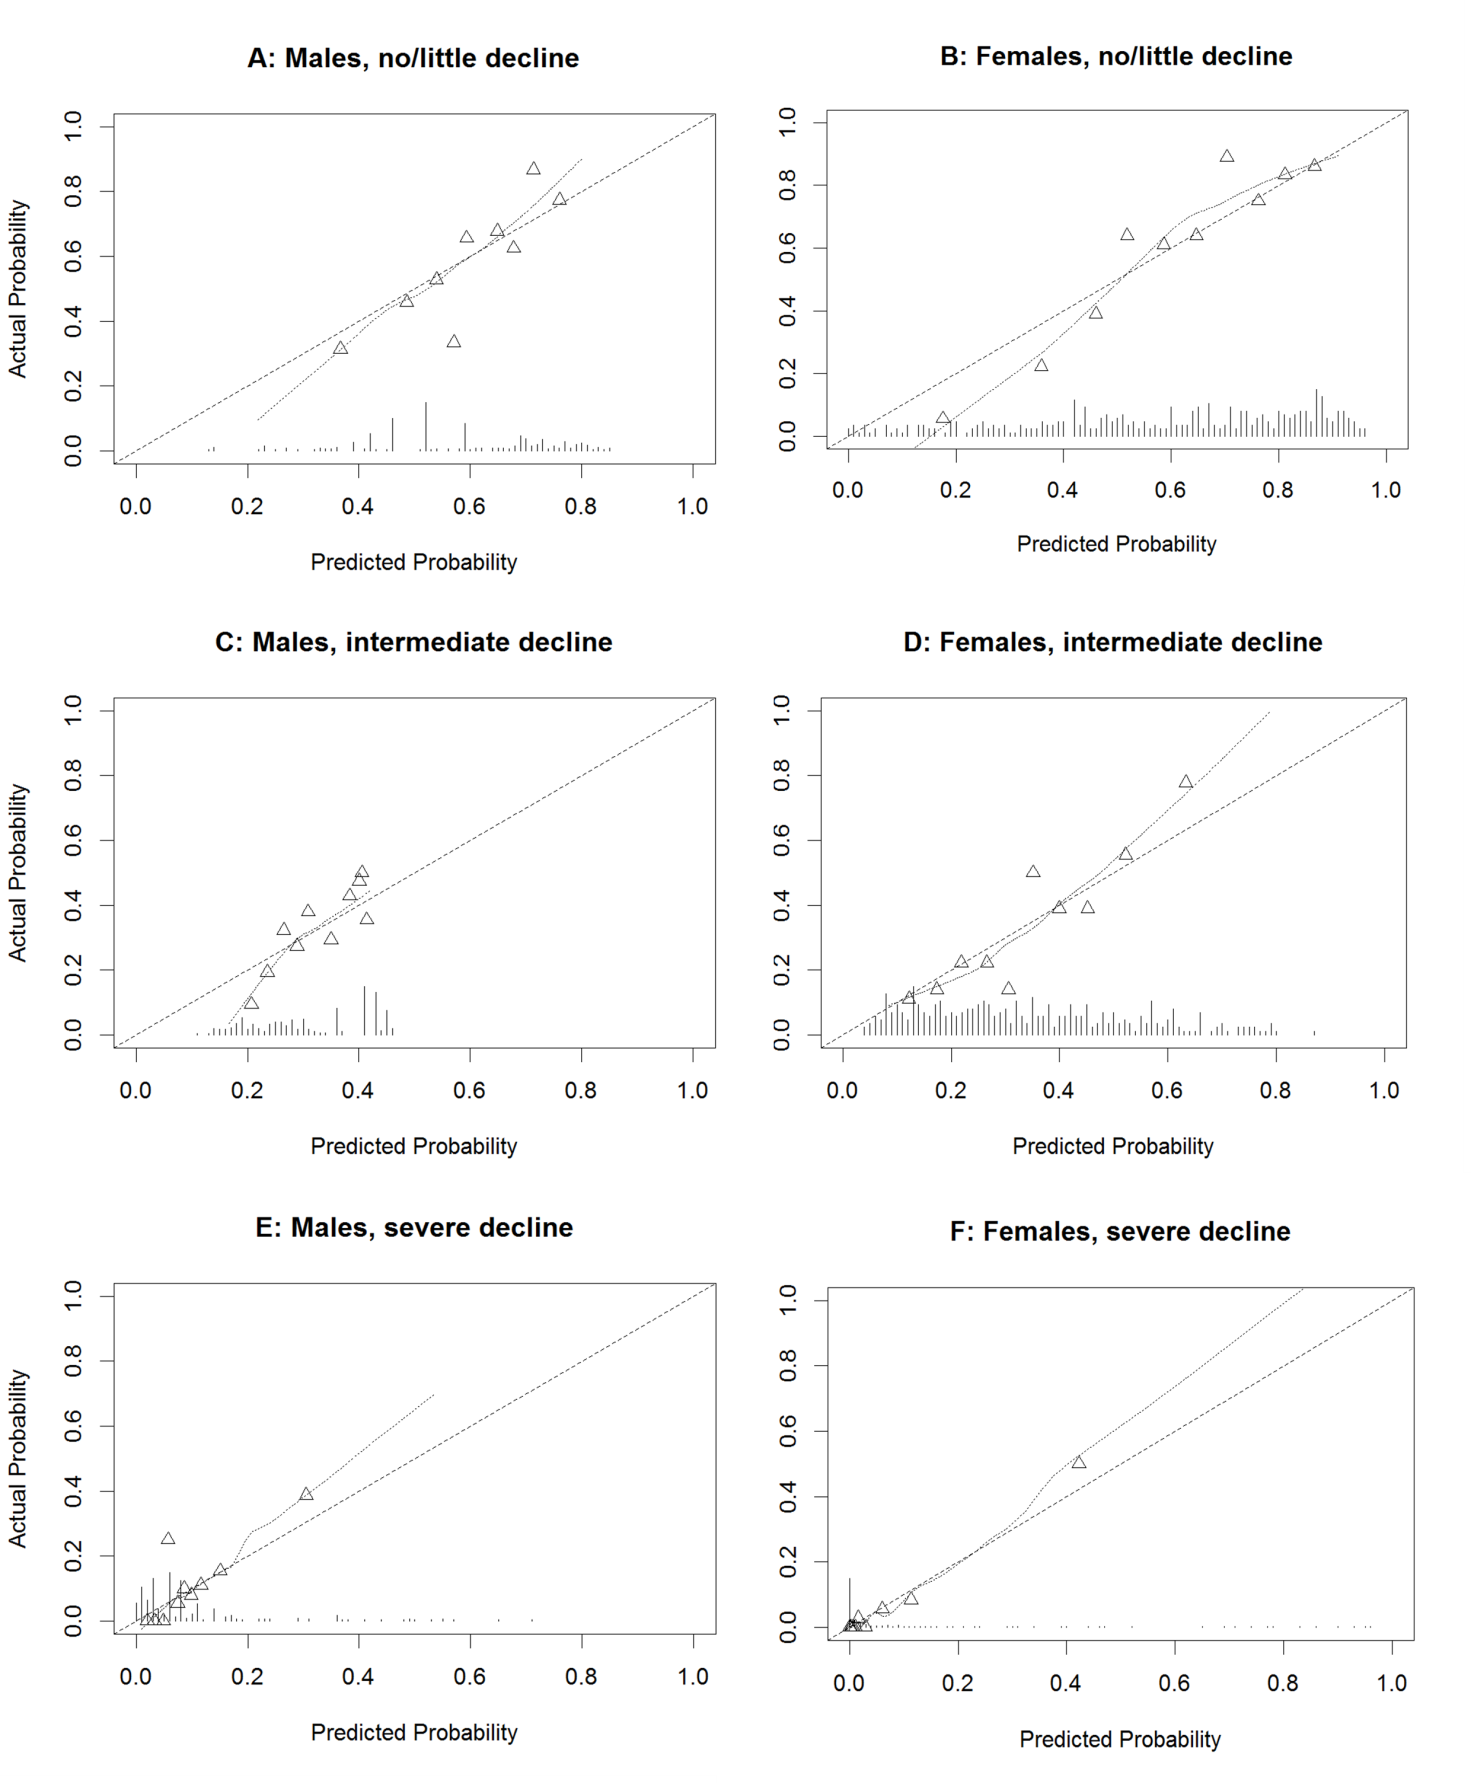
**

**Supplementary Figure 2:** Calibration plots of predicted probabilities for the three outcome categories no/little decline in (A) males and (B) females, intermediate decline in (C) males and (D) females, and severe decline in (E) males and (F) females. The dotted line indicates the association between predicted and observed probabilities. The dashed line indicates perfect calibration. Triangles indicate deciles of participants grouped by similar predicted probabilities. Vertical lines indicate the distribution of predicted probabilities.

**References Supplementary Material**

1. Radloff LS, Teri L. Use of the CES-D with older adults. *Clinical Gerontology.* 1986;5:119-136.

2. Tinetti ME, Richman D, Powell L. Falls efficacy as a measure of fear of falling. *J Gerontol.* 1990;45(6):P239-P243.

3. Caspersen CJ, Bloemberg BP, Saris WH, Merritt RK, Kromhout D. The prevalence of selected physical activities and their relation with coronary heart disease risk factors in elderly men: the Zutphen Study, 1985. *Am J Epidemiol.* 1991;133(11):1078-1092.

4. Voorrips LE, Ravelli AC, Dongelmans PC, Deurenberg P, Van Staveren WA. A physical activity questionnaire for the elderly. *Med Sci Sports Exerc.* 1991;23(8):974-979.

5. Folstein MF, Folstein SE, McHugh PR. "Mini-mental state". A practical method for grading the cognitive state of patients for the clinician. *J Psychiatr Res.* 1975;12(3):189-198.

6. Lachman ME, Howland J, Tennstedt S, Jette A, Assmann S, Peterson EW. Fear of falling and activity restriction: the survey of activities and fear of falling in the elderly (SAFE). *J Gerontol B Psychol Sci Soc Sci.* 1998;53(1):P43-P50.
